# Supplementary material
Source: publisher figshare collection journal article supplement (https://acs.figshare.com/ndownloader/files/5203894)
Supplement: Supplementary file 1 [file 5203894]

Efficient flame retardant thin films synthesized by  
atmospheric pressure PECVD through the high co-  
deposition rate of hexamethyldisiloxane and  
triethylphosphate on polycarbonate and polyamide-6  
substrates

*Florian Hilt,<sup>†,‡,§</sup> Nicolas Gherardi,<sup>‡,§</sup> David Duday,<sup>†</sup> Aurélien Berné,<sup>‡,§</sup> Patrick Choquet<sup>\*†</sup>*

<sup>†</sup>Materials Research and Technology Department, Luxembourg Institute of Science and  
Technology, 41, rue du Brill, L-4422 Belvaux, Luxembourg

<sup>‡</sup>Université de Toulouse ; UPS, INP ; LAPLACE (Laboratoire Plasma et Conversion d'Energie) ;  
118 route de Narbonne, F-31062 Toulouse, France

<sup>§</sup>CNRS ; LAPLACE ; F-31062 Toulouse, France

## EXPERIMENTAL METHODS

**UL-94 V.** The Underwriters Laboratories-94 (UL-94) vertical burning test is performed on test specimens ( $100 \times 15 \times 5 \text{ mm}^3$ ) vertically suspended above a cotton patch, used to identify burning droplets. The classification is defined according to the American National Standard UL 94-2006.

## RESULTS AND DISCUSSION

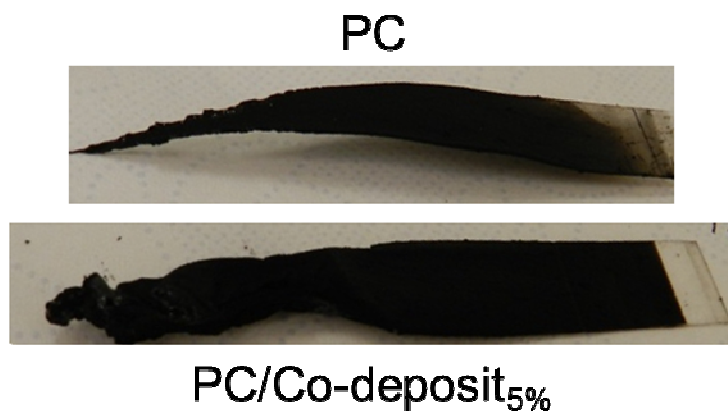

**Figure S1.** Pictures corresponding to a PC sample and of one of the five tested PC/Co-deposit<sub>5%</sub> samples submitted to the UL-94 vertical test.

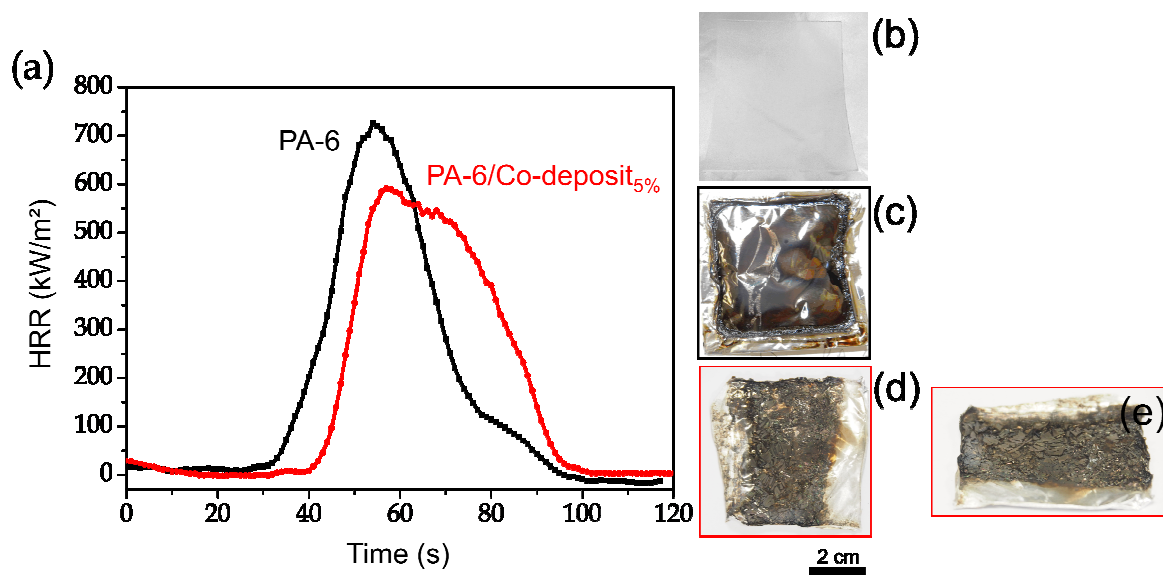

**Figure S2.** (a) Heat release rate (HRR) as a function of exposure time to an external heat flux of  $35 \text{ kW} \cdot \text{m}^{-2}$  for different materials: polyamide-6 (PA-6, black) and co-deposit<sub>5%</sub>-coated PA-6 (PA-6/Co-deposit<sub>5%</sub>, red). Pictures associated to the tested samples are presented and are referred as follow: (b) virgin PA-6 before fire testing, (c) virgin PA-6 residue after fire testing, (d) top view and (e) tilted view of the co-deposit<sub>5%</sub>-coated PA-6 residue after fire testing .

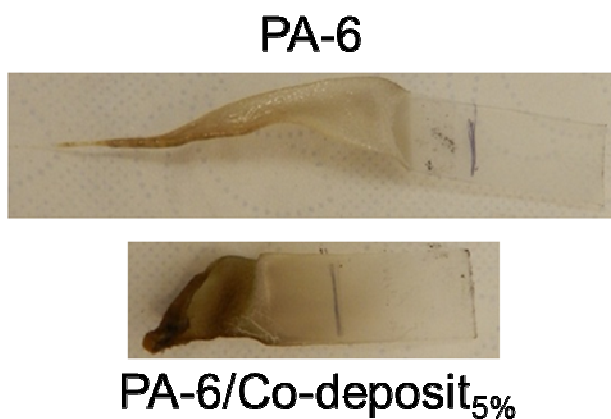

**Figure S3.** Pictures corresponding to a PA-6 sample and of one of the five tested PA-6/Co-deposit<sub>5%</sub> samples submitted to the UL-94 vertical test.

**Table S1.** Concentration of the different siloxane units present in the thin films elaborated from the solution HMDSO:TEP (75:25) and for different oxygen concentrations introduced into the discharge. Table associated to Figure 7.

| N <sub>2</sub> -O <sub>2</sub> (%) | Relative concentration (%area) |     |     |     |     |
|------------------------------------|--------------------------------|-----|-----|-----|-----|
|                                    | (M)                            | (D) | (T) | (Q) | (Z) |
| 100 – 0                            | 26                             | 42  | 22  | 6   | 4   |
| 95 – 5                             | 39                             | 41  | 17  | 3   | 0   |
| 50 – 50                            | 28                             | 40  | 25  | 8   | 0   |

**Table S2.** Cone calorimeter results associated to Figure 8.

|                                | TTI (s)    | pHRR (kW/m <sup>2</sup> ) |
|--------------------------------|------------|---------------------------|
| PC                             | 40 (± 8)   | 242 (± 20)                |
| PC / ppHMDSO <sub>5%</sub>     | 87 (± 21)  | 213 (± 18)                |
| PC / Co-deposit <sub>5%</sub>  | 117 (± 5)  | 186 (± 8)                 |
| PC / ppHMDSO <sub>50%</sub>    | 95(± 30)   | 246 (± 10)                |
| PC / Co-deposit <sub>50%</sub> | 145 (± 50) | 249 (± 5)                 |

**Table S3.** Cone calorimeter results associated to Figure 11.

|                                  | TTI (s)     | pHRR (kW/m <sup>2</sup> ) |
|----------------------------------|-------------|---------------------------|
| PA-6                             | 50 (± 18)   | 498 (± 46)                |
| PA-6 / Co-deposit <sub>5%</sub>  | N/A         | N/A                       |
| PA-6 / Co-deposit <sub>50%</sub> | 370 (± 120) | 94 (± 68)                 |
